# Supplementary material
Source: publisher figshare collection journal article supplement (https://rs.figshare.com/ndownloader/files/13440047)
Supplement: Supplementary file 1 [file 13440047]

**Supplementary Materials**

**Manuscript title:** Soil inorganic carbon in mangroves of tropical China: patterns and implications

**Authors:** Wei Guan, Yanmei Xiong, Baowen Liao

**Figure S1** Relation between soil inorganic C (IC) concentrations measured by method 1 and method 2. Method 1 refers to the combination of wet oxidation and dry combustion and method 2 refers to the method of dry combustion with or without removing IC with HCl.

**Figure S2** Relationship between soil inorganic C fraction and stable C isotope signature (*δ* 13C).

**Figure S3** The relation between soil pH and soil inorganic carbon concentration.
